# Supplementary material
Source: PubMed Central journal article supplement (PMC4729237)

# Supplemental Figure 1

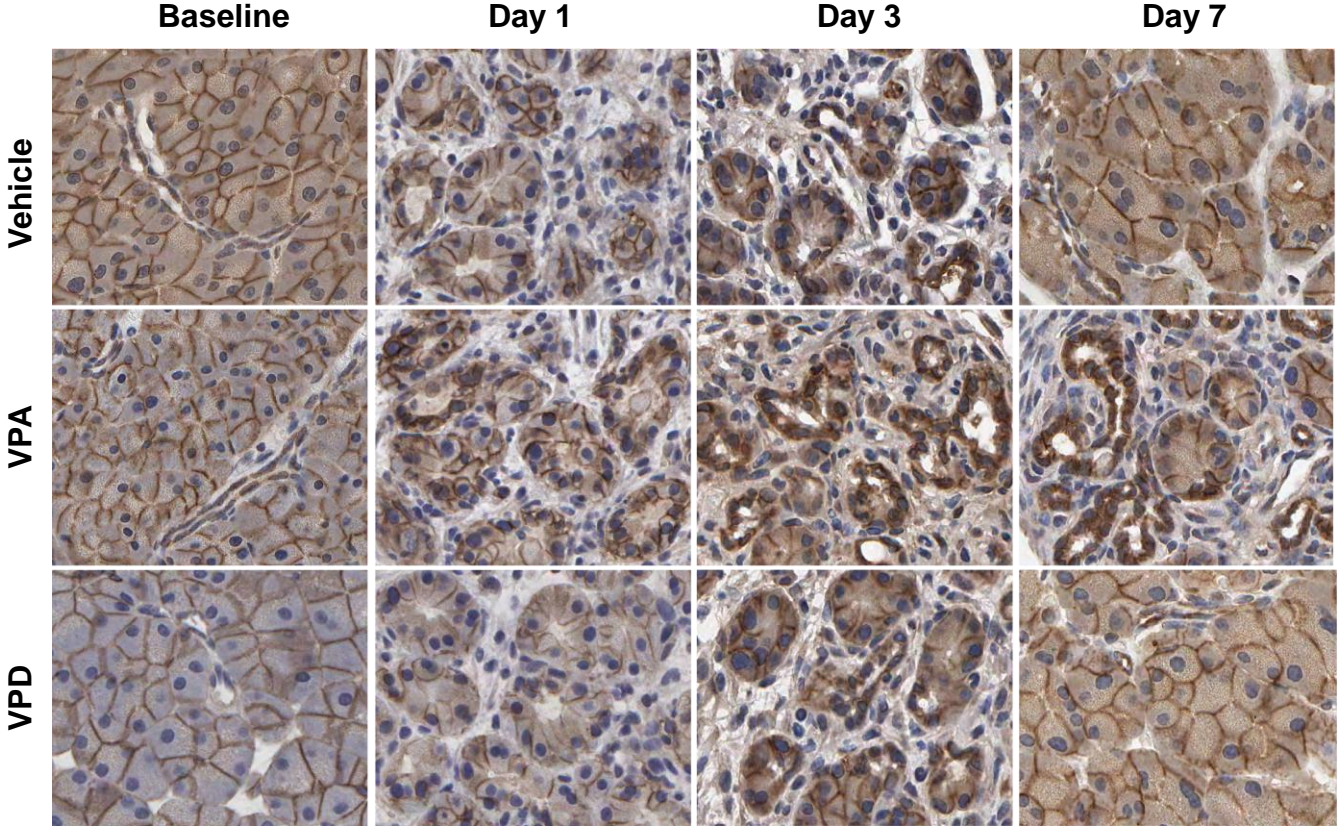

Supplement: mmc1.pdf [file mmc1.pdf]
